# Supplementary material for: Breaking bad news in oncology practice: experience and challenges of oncology health professionals in Ethiopia – an exploratory qualitative study
Source: HighWire-hosted journal article supplement (doi:10.1136/bmjopen-2024-087977), 2024-05-01
Supplement: bmjopen-2024-087977supp001_data_supplement.pdf [file bmjopen-2024-087977supp001_data_supplement.pdf]

**SRQR of Manuscript ID bmjopen-2024-087977 (bmjopen-2021-051425.R1): BBN NEWS IN ONCOLOGY PRACTICE**

| No.                       | Topic                                                                                      | Item                                                                                                                                                                                                                                                                                                                                             | Page/line no.                          |
|---------------------------|--------------------------------------------------------------------------------------------|--------------------------------------------------------------------------------------------------------------------------------------------------------------------------------------------------------------------------------------------------------------------------------------------------------------------------------------------------|----------------------------------------|
| <b>Title and abstract</b> |                                                                                            |                                                                                                                                                                                                                                                                                                                                                  |                                        |
| S1                        | Title                                                                                      | Concise description of the nature and topic of the study Identifying the study as qualitative or indicating the approach (e.g., ethnography, grounded theory) or data collection methods (e.g., interview, focus group) is recommended                                                                                                           | Manuscript file (MF)-Page 1, line 2-6  |
| S2                        | Abstract                                                                                   | Summary of key elements of the study using the abstract format of the intended publication; typically includes background, purpose, methods, results, and conclusions                                                                                                                                                                            | MF: page2, line 25-49                  |
| <b>Introduction</b>       |                                                                                            |                                                                                                                                                                                                                                                                                                                                                  |                                        |
| S3                        | Problem formulation                                                                        | Description and significance of the problem/phenomenon studied; review of relevant theory and empirical work; problem statement                                                                                                                                                                                                                  | MF: page 3&4, line 56-99               |
| S4                        | Purpose or research question                                                               | Purpose of the study and specific objectives or questions                                                                                                                                                                                                                                                                                        | MF: Page 4, 100-102                    |
| <b>Methods</b>            |                                                                                            |                                                                                                                                                                                                                                                                                                                                                  |                                        |
| S5                        | Qualitative approach and research paradigm                                                 | Qualitative approach (e.g., ethnography, grounded theory, case study, phenomenology, narrative research) and guiding theory if appropriate; identifying the research paradigm (e.g., postpositivist, constructivist/interpretivist) is also recommended; rationale <sup>b</sup>                                                                  | MF: page 5, line 113 &114              |
| S6                        | Researcher characteristics and reflexivity                                                 | Researchers' characteristics that may influence the research, including personal attributes, qualifications/experience, relationship with participants, assumptions, and/or presuppositions; potential or actual interaction between researchers' characteristics and the research questions, approach, methods, results, and/or transferability | MF: Page5, line 114-122, & Table1      |
| S7                        | Context                                                                                    | Setting/site and salient contextual factors; rationale <sup>b</sup>                                                                                                                                                                                                                                                                              | MF: Page 4, line 104-111               |
| S8                        | Sampling strategy                                                                          | How and why research participants, documents, or events were selected; criteria for deciding when no further sampling was necessary (e.g., sampling saturation); rationale <sup>b</sup>                                                                                                                                                          | MF: page:5, line 114-126               |
| S9                        | Ethical issues pertaining to human subjects                                                | Documentation of approval by an appropriate ethics review board and participant consent, or explanation for lack thereof; other confidentiality and data security issues                                                                                                                                                                         | MF: page 7, line 182-186               |
| S10                       | Data collection methods                                                                    | Types of data collected; details of data collection procedures including (as appropriate) start and stop dates of data collection and analysis, iterative process, triangulation of sources/methods, and modification of procedures in response to evolving study findings; rationale <sup>b</sup>                                               | MF: page 5 &6: line 127- 148           |
| S11                       | Data collection instruments technologies                                                   | Description of instruments (e.g., interview guides, questionnaires) and devices (e.g., audio recorders) used for data collection; if/how the instrument(s) changed over the course of the study                                                                                                                                                  | MF: page 5 &6: line 127- 148           |
| S12                       | Units of study                                                                             | Number and relevant characteristics of participants, documents, or events included in the study; level of participation (could be reported in results)                                                                                                                                                                                           | MF: page 5, line 119-122, and table 1, |
| S13                       | Data processing                                                                            | Methods for processing data prior to and during analysis, including transcription, data entry, data management and security, verification of data integrity, data coding, and anonymization/deidentification of excerpts                                                                                                                         | MF: Page 6&7, line 153-168             |
| S14                       | Data analysis                                                                              | Process by which inferences, themes, etc., were identified and developed, including the researchers involved in data analysis; usually references a specific paradigm or approach; rationale <sup>b</sup>                                                                                                                                        | MF: Page 6&7, line 153-168             |
| S15                       | Techniques to enhance trustworthiness                                                      | Techniques to enhance trustworthiness and credibility of data analysis (e.g., member checking, audit trail, triangulation); rationale <sup>b</sup>                                                                                                                                                                                               | MF: page7, line169-181                 |
| <b>Results/findings</b>   |                                                                                            |                                                                                                                                                                                                                                                                                                                                                  |                                        |
| S16                       | Synthesis and interpretation                                                               | Main findings (e.g., interpretations, inferences, and themes); might include development of a theory or model, or integration with prior research or theory                                                                                                                                                                                      | MF: Page 8-17, line 192-478            |
| S17                       | Links to empirical data                                                                    | Evidence (e.g., quotes, field notes, text excerpts, photographs) to substantiate analytic findings                                                                                                                                                                                                                                               | MF: Page 8-17, line 192-478            |
| <b>Discussion</b>         |                                                                                            |                                                                                                                                                                                                                                                                                                                                                  |                                        |
| S18                       | Integration with prior work, implications, transferability, & contribution(s) to the field | Short summary of main findings; explanation of how findings and conclusions connect to, support, elaborate on, or challenge conclusions of earlier scholarship; discussion of scope of application/ generalizability; identification of unique contribution(s) to scholarship in a discipline or field                                           | MF: Page 17-22, line 480-615           |
| S19                       | Limitations                                                                                | Trustworthiness and limitations of findings                                                                                                                                                                                                                                                                                                      | MF: Page 22, line 616-623              |
| S20                       | Conflicts of interest                                                                      | Potential sources of influence or perceived influence on study conduct and conclusions; how these were managed                                                                                                                                                                                                                                   | MF: page 22, line 636 &637             |
| S21                       | Funding                                                                                    | Sources of funding and other support; role of funders in data collection, interpretation, and reporting                                                                                                                                                                                                                                          | MF: Page 1, line 24                    |
